# Supplementary material
Source: PubMed Central journal article supplement (PMC1480426)

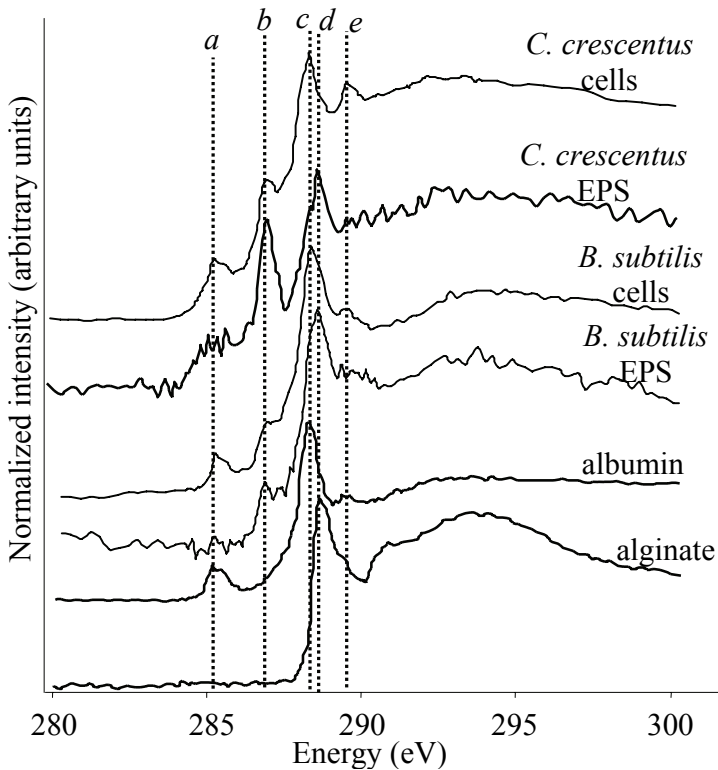

Supplement: pnas_0603255103_1.pdf [file pnas_0603255103_1.pdf]
